# Supplementary material for: Genetic diversity of historical Atlantic walruses (Odobenus rosmarus rosmarus) from Bjørnøya and Håøya (Tusenøyane), Svalbard, Norway
Source: PubMed Central journal article supplement (PMC4757977; doi:10.1186/s13104-016-1907-8), 2016-02-18

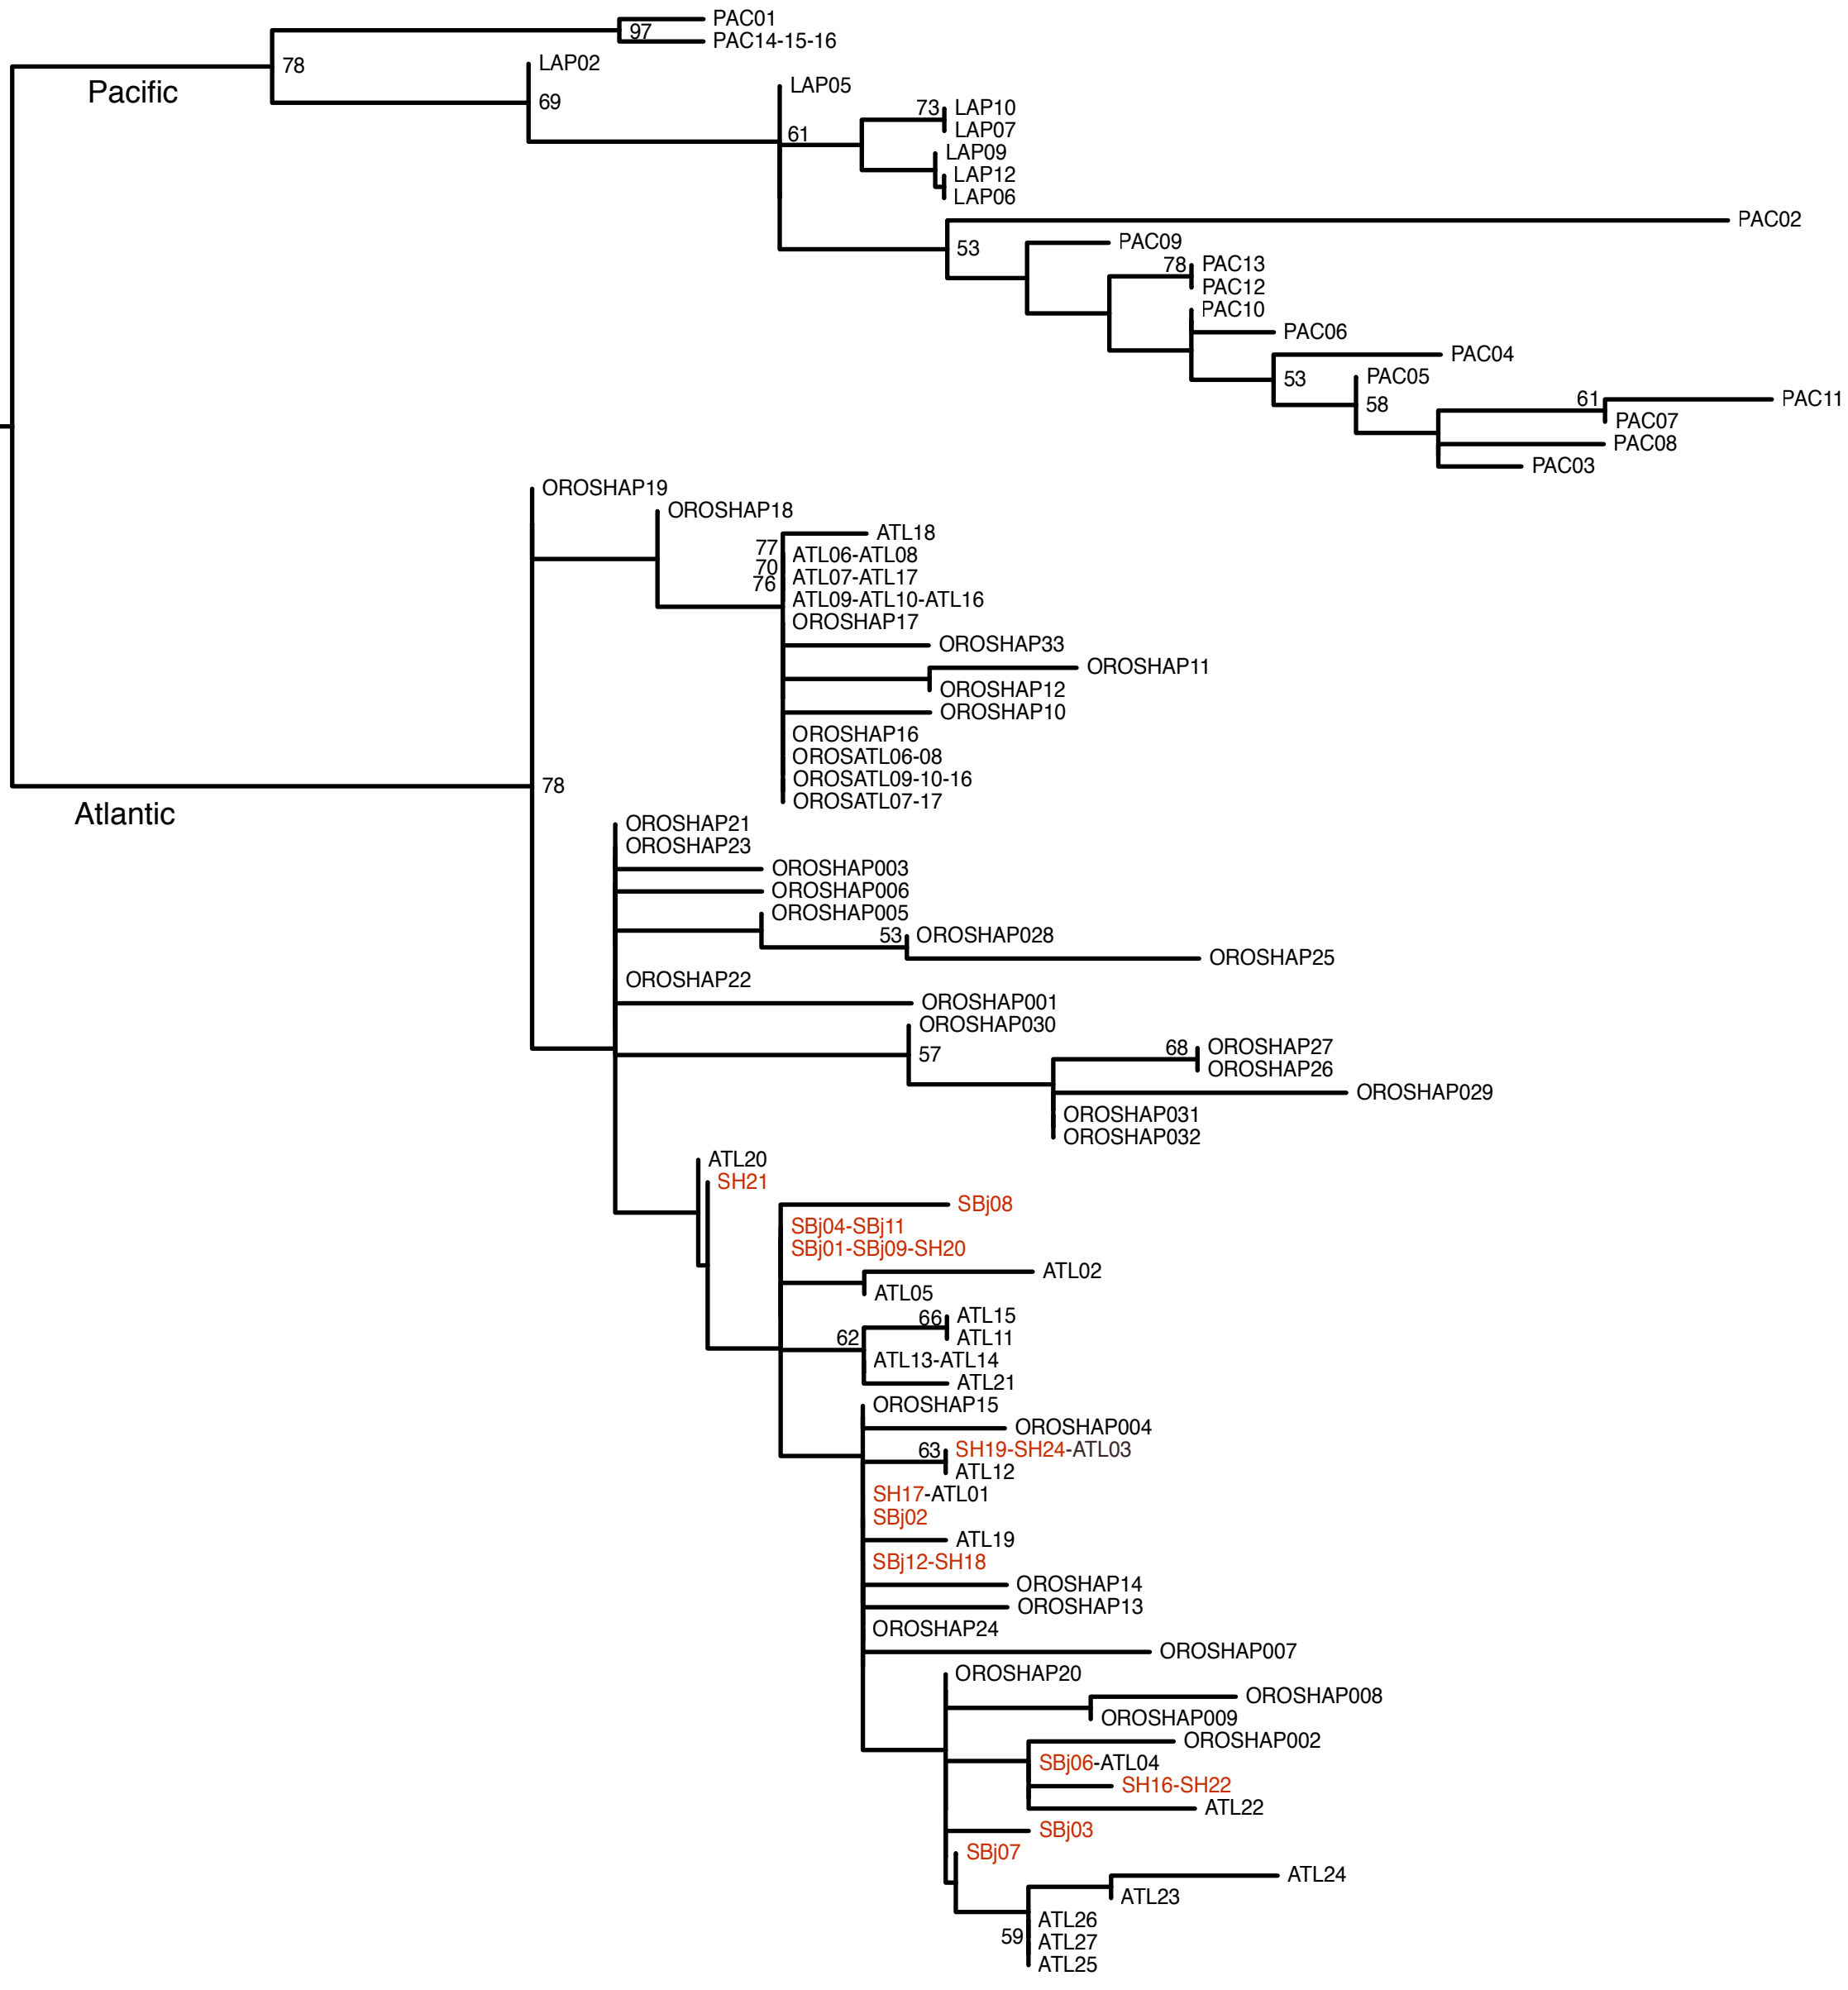

Supplement: 13104_2016_1907_MOESM5_ESM.pdf [file 13104_2016_1907_MOESM5_ESM.pdf]
